# Supplementary material for: Provenance variations in wood traits of Larix kaempferi (Lamb.) Carr. and their relationships with growth parameters
Source: Research Square preprint supplement (doi:10.21203/rs.3.rs-8673145/v1), 2026-02-10
Supplement: Supplementary file 1 [file e25fb8ef70148b45f2c81ec3.docx]

**Table S1** The heritability, phenotypic variation coefficient and genetic variation coefficient for 3-year-old, 9-year-old and 13-year-old wood traits in *Larix kaempferi*

| Trait (units) |  | | | (%) | | | (%) | | |
| --- | --- | --- | --- | --- | --- | --- | --- | --- | --- |
| 5 | 9 | 13 | 5 | 9 | 13 | 5 | 9 | 13 |
| EWW_L | 0.53 (0.37) | 0.16 (0.16) | 0.16 (0.18) | 30.98 | 35.91 | 33.63 | 5.11 | 8.55 | 4.55 |
| LWW_L | 0.54 (0.38) | 0.47 (0.35) | 0.26 (0.22) | 30.89 | 31.27 | 32.20 | 6.03 | 9.01 | 0.02 |
| EWFL (μm) | 0.04 (0.13) | 0.10 (0.30) | 0.08 (0.33) | 16.17 | 12.00 | 11.64 | 0.04 | 0.01 | 0.01 |
| LWFL (μm) | 0.58 (0.39) | 0.03 (0.25) | 0.03 (0.25) | 12.56 | 10.80 | 9.92 | 0.03 | 4.40 | 0.01 |
| EWFW (μm) | 0.52 (0.36) | 0.48 (0.35) | 0.58 (0.39) | 13.42 | 10.18 | 10.94 | 0.01 | 0.01 | 1.93 |
| LWFW (μm) | 0.75 (0.45) | 0.70 (0.42) | 0.45 (0.17) | 10.25 | 11.76 | 14.21 | 0.01 | 0.01 | 0.12 |
| EWFL_W | 0.65 (0.19) | 0.63 (0.43) | 0.62 (0.42) | 20.46 | 15.70 | 14.81 | 0.03 | 0.04 | 6.93 |
| LWFL_W | 0.60 (0.39) | 0.32 (0.18) | 0.18 (0.17) | 10.25 | 15.02 | 15.82 | 0.01 | 0.02 | 0.01 |
| EMAF (°) | 0.44 (0.29) | 0.36 (0.24) | 0.26 (0.33) | 13.09 | 14.11 | 15.16 | 0.03 | 0.01 | 4.28 |
| LMAF (°) | 0.27 (0.16) | 0.19 (0.21) | 0.13 (0.16) | 14.28 | 19.73 | 21.42 | 0.14 | 0.01 | 0.01 |
| LWP (%) | 0.26 (0.30) | 0.13 (0.13) | 0.16 (0.30) | 26.96 | 23.31 | 21.20 | 21.86 | 20.01 | 16.12 |
| BD (g/cm3) | 0.63 (0.41) | 0.52 (0.35) | 0.23 (0.18) | 12.05 | 11.55 | 13.15 | 0.01 | 0.03 | 0.01 |

Notes: wood anatomical traits: wall-to-lumen ratio of earlywood (EWW_L); wall-to-lumen ratio of latewood (LWW_L); tracheid length of earlywood (EWFL), tracheid length of latewood (LWFL), length-to-width of earlywood tracheid (EWFL_W), length-to-width of latewood tracheid (LWFL_W), tracheid width of earlywood (EWFW), tracheid width of latewood (LWFW), microfibril angle of earlywood (EMAF), microfibril angle of latewood (LMAF), latewood proportion (LWP), and wood basic density (BD).

**Table S2** Pearson correlation between wood traits of age 5, 9, 13 and growth curve parameters in *Larix kaempferi*

|  | *HGTa* | *HGTr* | *HGTb* | *DBHa* | *DBHr* | *DBHb* |
| --- | --- | --- | --- | --- | --- | --- |
| EWW_L5 | 0.10 | -0.08 | 0.18* | -0.01 | 0.08 | 0.01 |
| EWW_L9 | 0.09 | -0.08 | -0.04 | 0.07 | 0.03 | -0.02 |
| EWW_L13 | 0.24* | -0.20* | 0.06 | 0.06 | -0.06 | -0.06 |
| LWW_L5 | -0.04 | 0.05 | -0.11 | 0.10 | 0.04 | -0.03 |
| LWW_L9 | -0.18* | 0.20* | -0.05 | -0.08 | 0.09 | 0.04 |
| LWW_L13 | 0.10 | -0.10 | -0.04 | 0.20* | -0.30* | -0.07 |
| EWFL5 | 0.34* | -0.27* | 0.17* | 0.18* | -0.09 | -0.30* |
| EWFL9 | 0.26* | -0.21* | 0.05 | 0.23* | -0.12 | -0.36* |
| EWFL13 | 0.23* | -0.15* | 0.13 | 0.09 | -0.03 | -0.29* |
| LWFL5 | 0.38* | -0.36* | 0.05 | 0.26* | -0.03 | -0.20* |
| LWFL9 | 0.31* | -0.31* | 0.04 | 0.32* | -0.13 | -0.27* |
| LWFL13 | 0.32* | -0.28* | -0.01 | 0.39* | -0.13 | -0.23* |
| EWFW5 | 0.20* | -0.20* | -0.08 | 0.36* | -0.19* | -0.14 |
| EWFW9 | 0.17* | -0.12 | -0.12 | 0.42* | 0.04 | -0.03 |
| EWFW13 | 0.21* | -0.15* | -0.12 | 0.48* | 0.04 | -0.04 |
| LWFW5 | 0.02 | -0.05 | -0.09 | 0.13 | -0.04 | 0.08 |
| LWFW9 | 0.04 | -0.06 | -0.11 | 0.14 | 0.04 | 0.06 |
| LWFW13 | 0.00 | -0.01 | -0.11 | 0.15* | -0.07 | 0.02 |
| EWFL_W5 | 0.12 | -0.06 | 0.21* | -0.12 | 0.07 | -0.13 |
| EWFL_W9 | 0.11 | -0.10 | 0.15* | -0.08 | -0.15 | -0.28* |
| EWFL_W13 | 0.04 | -0.02 | 0.19* | -0.24* | -0.09 | -0.21* |
| LWFL_W5 | 0.02 | -0.05 | -0.09 | 0.13 | -0.04 | 0.08 |
| LWFL_W9 | 0.19* | -0.17* | 0.12 | 0.09 | -0.11 | -0.22* |
| LWFL_W13 | 0.21* | -0.17* | 0.08 | 0.11 | -0.04 | -0.15* |
| EWMA5 | -0.04 | -0.02 | 0.10 | 0.07 | 0.03 | 0.13 |
| EWMA9 | -0.12 | 0.09 | 0.12 | 0.00 | 0.09 | 0.24* |
| EWMA13 | -0.14 | 0.10 | 0.04 | 0.02 | 0.16 | 0.26* |
| LWMA5 | -0.05 | 0.01 | 0.12 | 0.01 | 0.03 | 0.12 |
| LWMA9 | -0.04 | 0.01 | 0.02 | -0.01 | -0.01 | 0.05 |
| LWMA13 | -0.15* | 0.13 | 0.12 | -0.02 | 0.11 | 0.16* |
| LWP5 | 0.01 | -0.01 | 0.05 | 0.05 | -0.09 | 0.00 |
| LWP9 | 0.01 | -0.01 | -0.12 | -0.09 | -0.08 | -0.02 |
| LWP13 | 0.08 | -0.08 | 0.08 | 0.00 | 0.04 | -0.03 |
| BD5 | -0.20* | 0.20* | 0.03 | -0.15* | -0.07 | 0.05 |
| BD9 | -0.07 | 0.04 | 0.01 | -0.06 | -0.20* | -0.03 |
| BD13 | -0.06 | 0.09 | -0.09 | -0.12 | -0.25* | -0.09 |

Notes: * *p*< 0.05. Wood traits: wall-to-lumen ratio of earlywood (EWW_L); wall-to-lumen ratio of latewood (LWW_L); tracheid length of earlywood (EWFL), tracheid length of latewood (LWFL), length-to-width of earlywood tracheid (EWFL_W), length-to-width of latewood tracheid (LWFL_W), tracheid width of earlywood (EWFW), tracheid width of latewood (LWFW), microfibril angle of earlywood (EMAF), microfibril angle of latewood (LMAF), latewood proportion (LWP), and wood basic density (BD). *HGTa*, maximum value of height; *HGTr*, relative growth rate of height; *HGTb*, initial growth parameter of tree height; *DBHa*, maximum value of diameter at breast height; *DBHr*, relative growth rate of diameter at breast height; *DBHb*, initial growth parameter of diameter at breast height
